# Supplementary material for: VCP activator reverses nuclear proteostasis defects and enhances TDP-43 aggregate clearance in multisystem proteinopathy models
Source: JCI journal article supplement (doi:10.1172/jci169039), 2024-05-23

# Uncropped/Unedited Western blots (Revisions)

JCI Manuscript Submission

Figure 1

# Figure 1, Panel F

Total and Nuclear Lysate  
Antibody: Mouse anti VCP (Invitrogen, MA3-004)

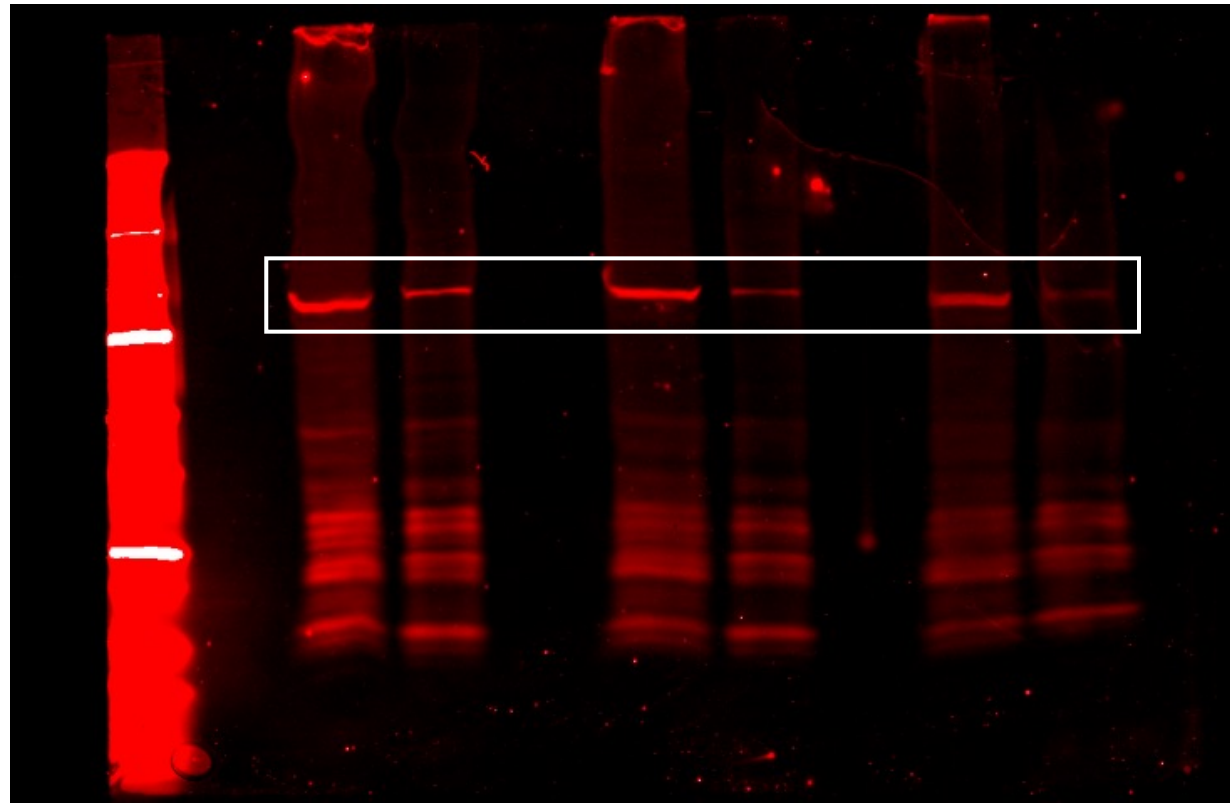

Cropped sections used for figures denoted by white box.

# Figure 1, Panel F

Total and Nuclear Lysate  
Antibody: Rat anti Nup98 (Abcam, ab50610)

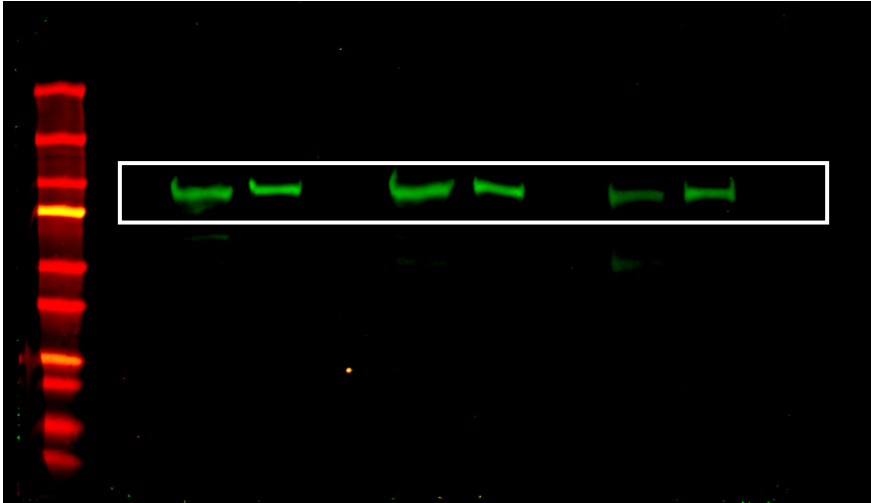

Total and Nuclear Lysate  
Antibody: Rabbit anti HSP90 (Cell Signaling, 4874)

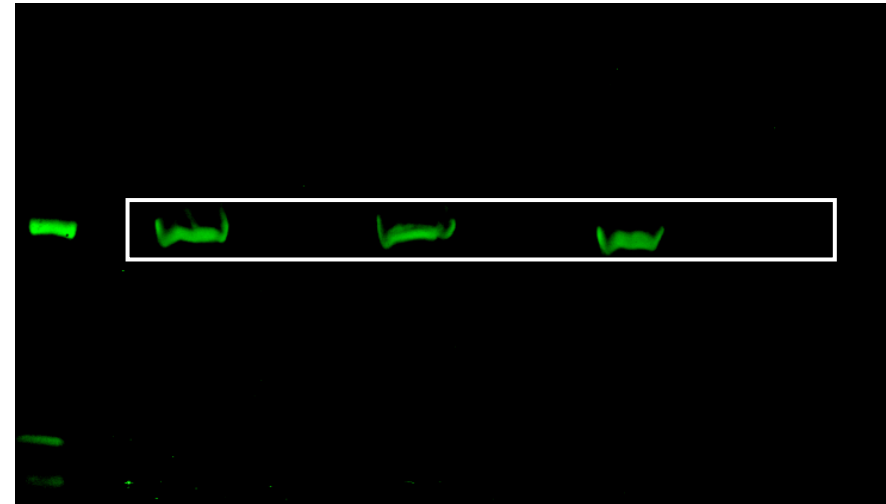

Same blot as above (not shown in figures)  
Antibody: Mouse anti VCP (Invitrogen, MA3-004)

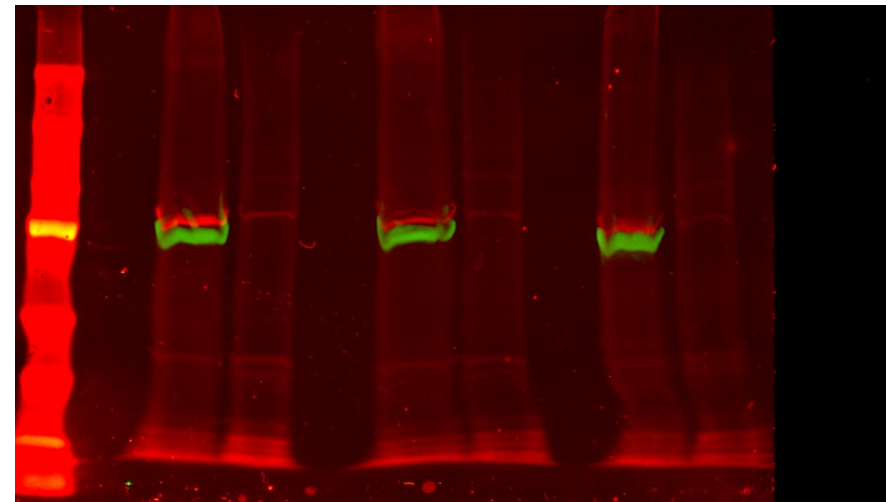

Cropped sections used for figures denoted by white box.

# Figure 2

## Figure 2, Panel C

Soluble TDP-4FL  
Antibody: Mouse anti Myc (9E10)

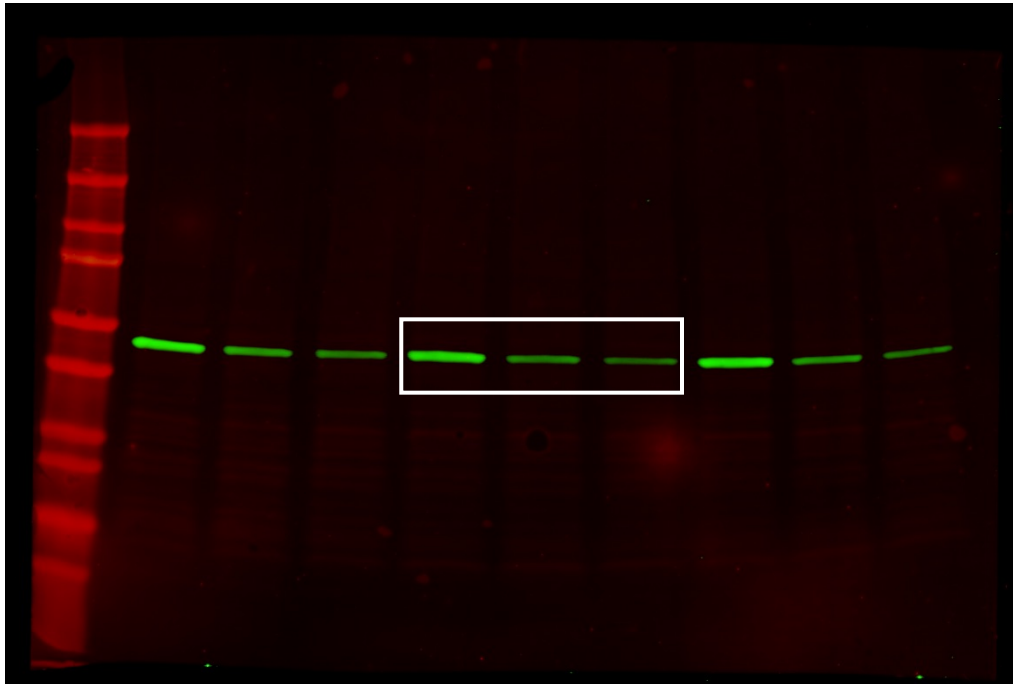

Insoluble TDP-4FL  
Antibody: Mouse anti Myc (9E10)

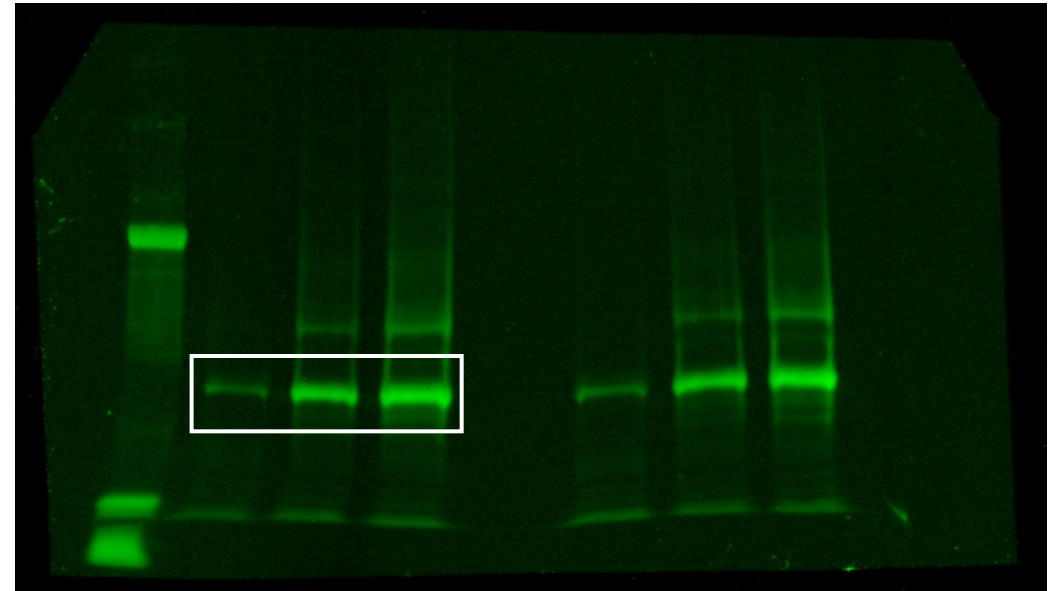

## Figure 2, Panel C

Loading Control

Antibody: Rabbit anti GAPDH (Cell Signaling, 2118)

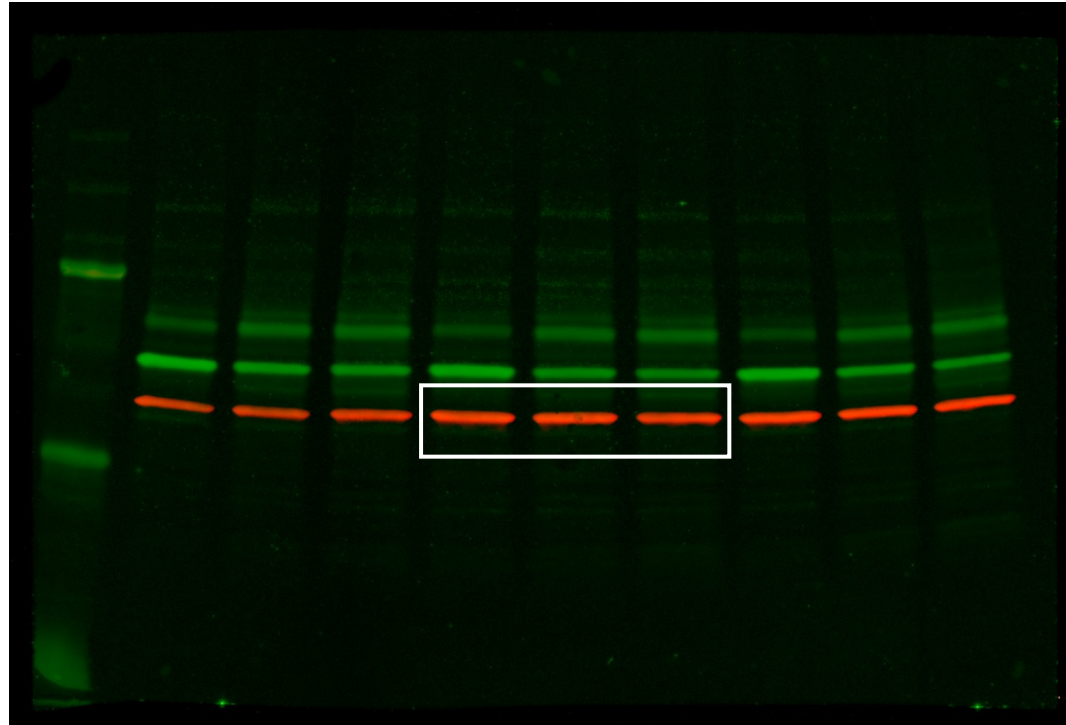

Cropped sections used for figures denoted by white box.

## Figure 2, Panel F

Myc Immunoprecipitation

Antibody: Rabbit anti Ubiquitin (Cell Signaling, 43124); Mouse anti Myc (9E10)

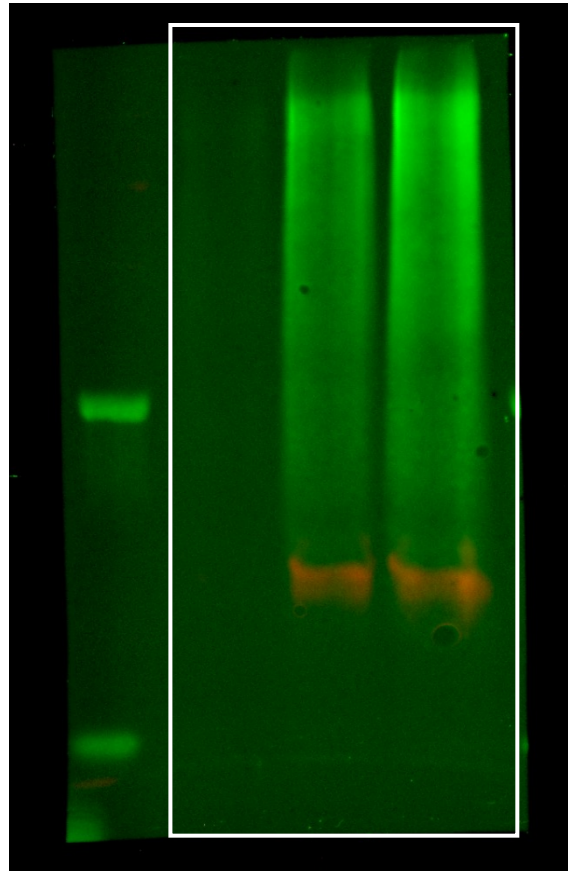



Figure 3

## Figure 3, Panel F

Soluble TDP-4FL  
Antibody: Mouse anti Myc (9E10)

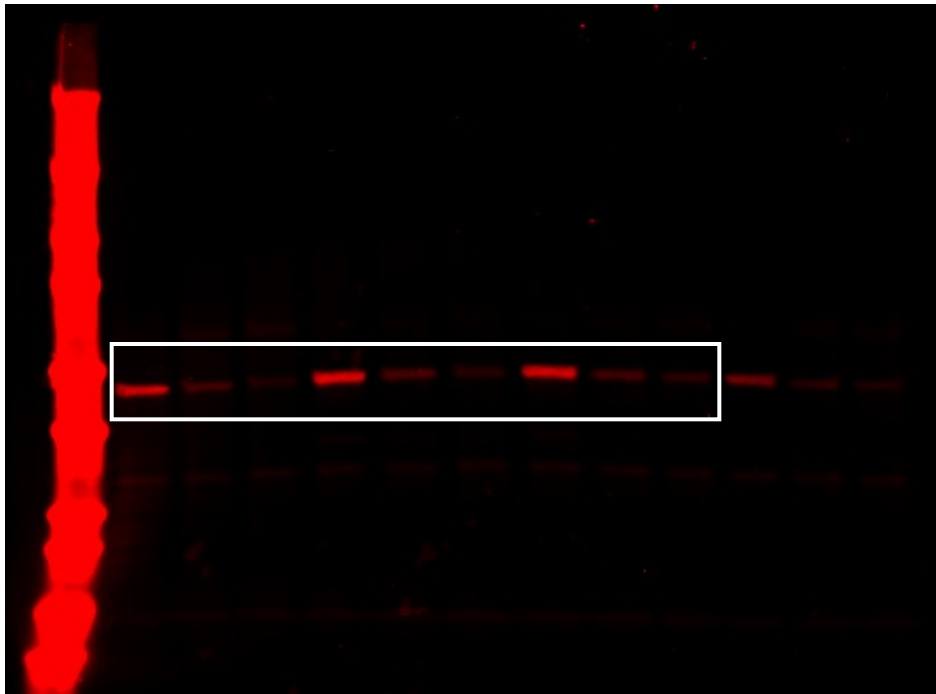

Insoluble TDP-4FL  
Antibody: Mouse anti Myc (9E10)

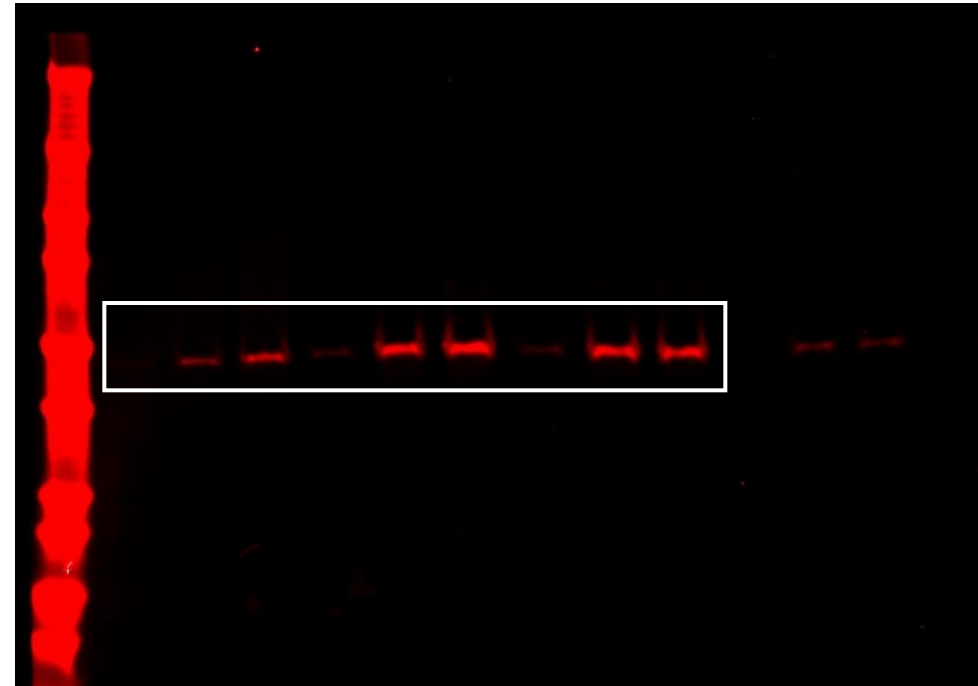

## Figure 3, Panel F

Loading Control

Antibody: Rabbit anti GAPDH (Cell Signaling, 2118)

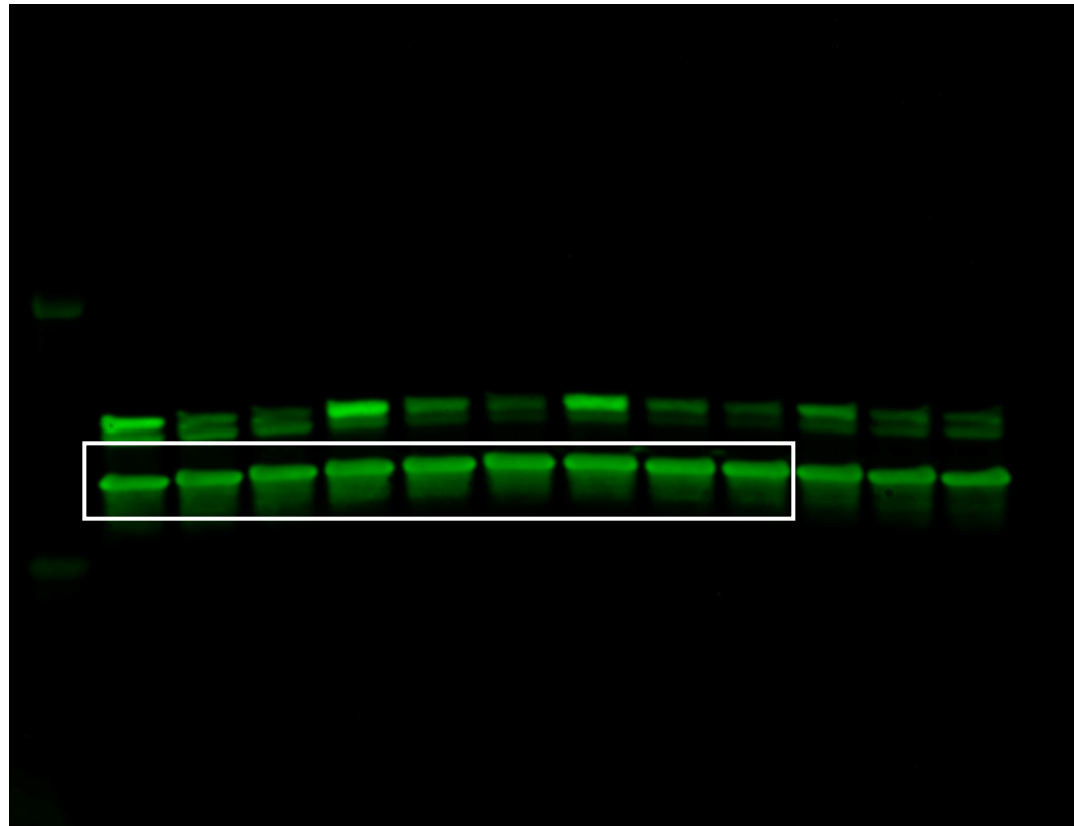

Cropped sections used for figures denoted by white box.

Figure 4

## Figure 4, Panel C

Soluble TDP-4FL  
Antibody: Mouse anti Myc (9E10)

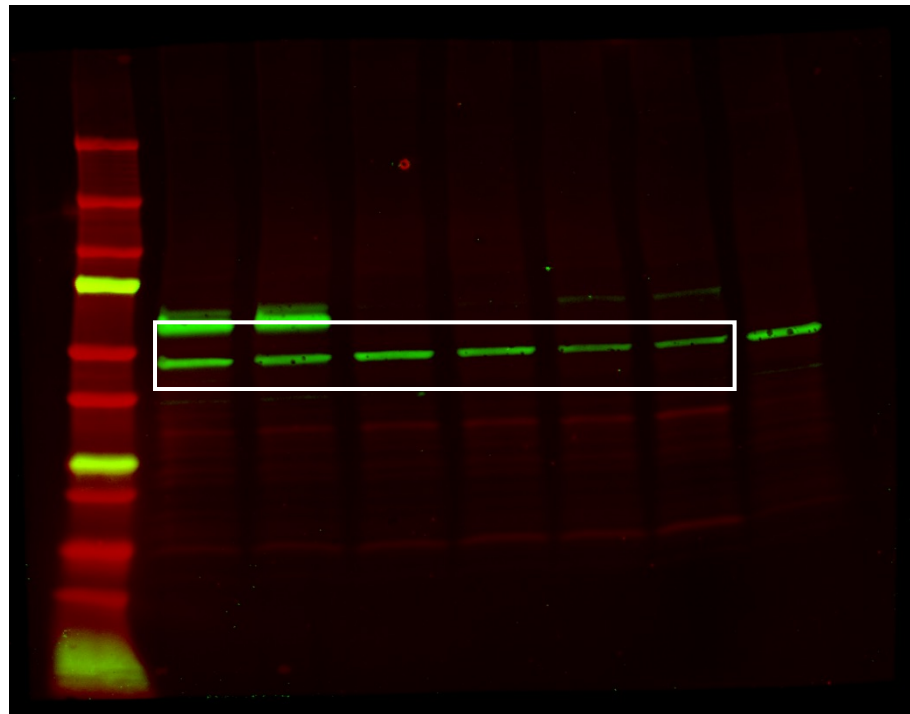

Insoluble TDP-4FL  
Antibody: Mouse anti Myc (9E10)

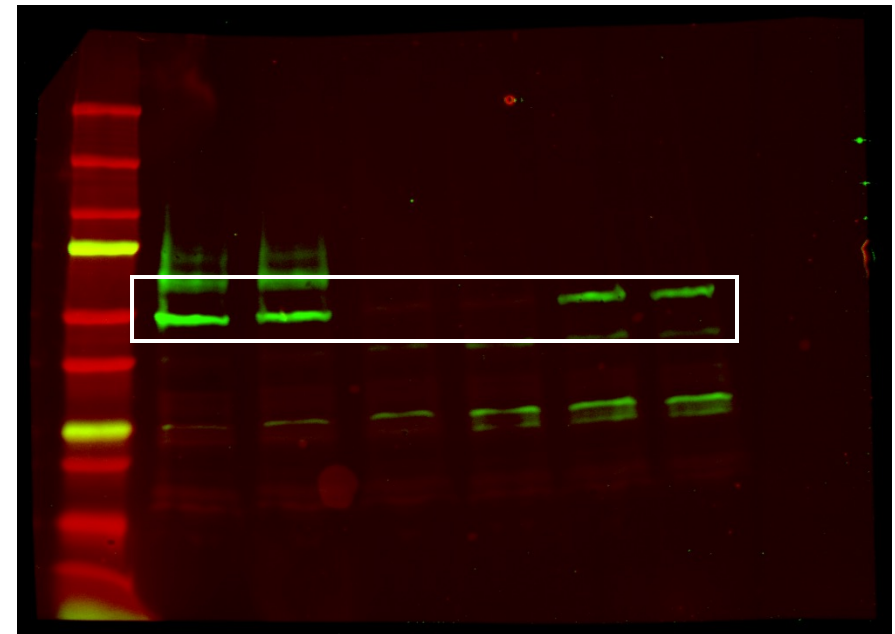

## Figure 4, Panel C

Loading Control

Antibody: Rabbit anti GAPDH (Cell Signaling, 2118)

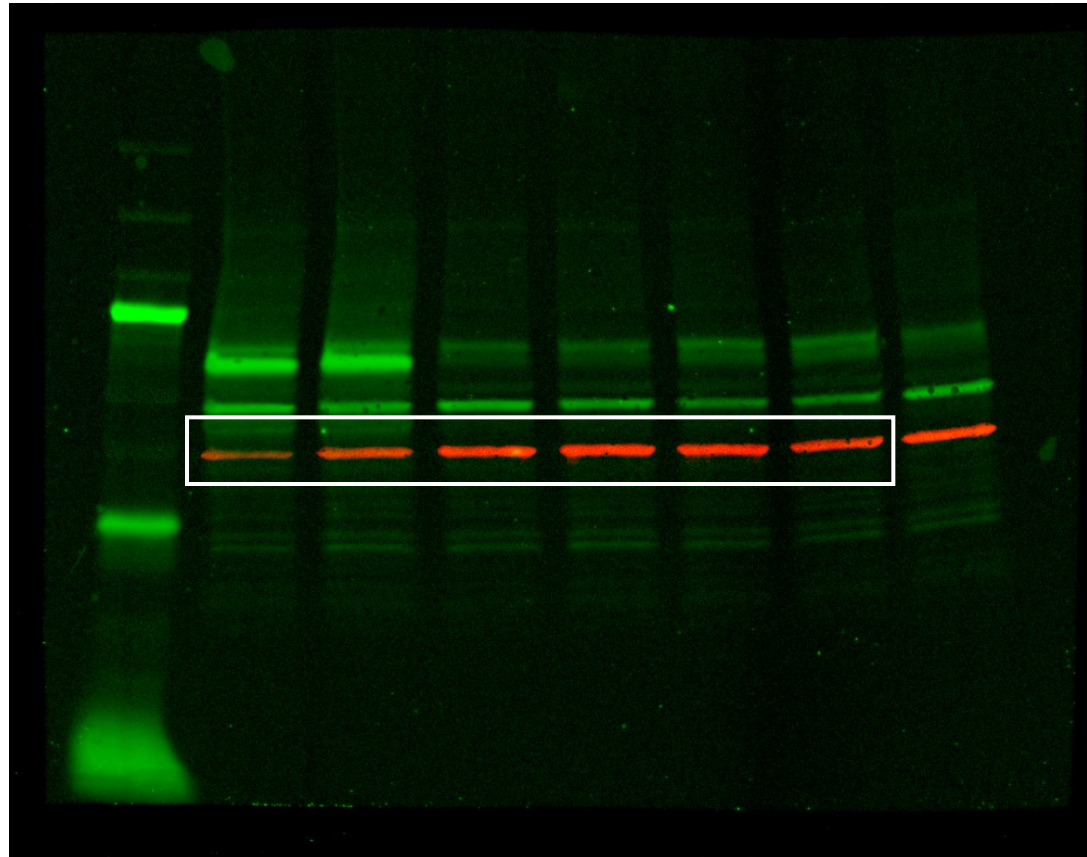

Cropped sections used for figures denoted by white box.

Figure 7

## Figure 7, Panel E

Soluble TDP-4FL

Antibody: Mouse anti Myc (9E10)

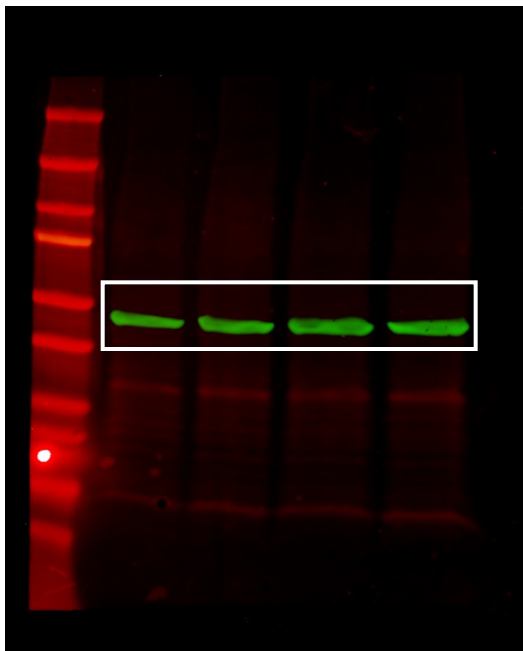

Insoluble TDP-4FL

Antibody: Mouse anti Myc (9E10)

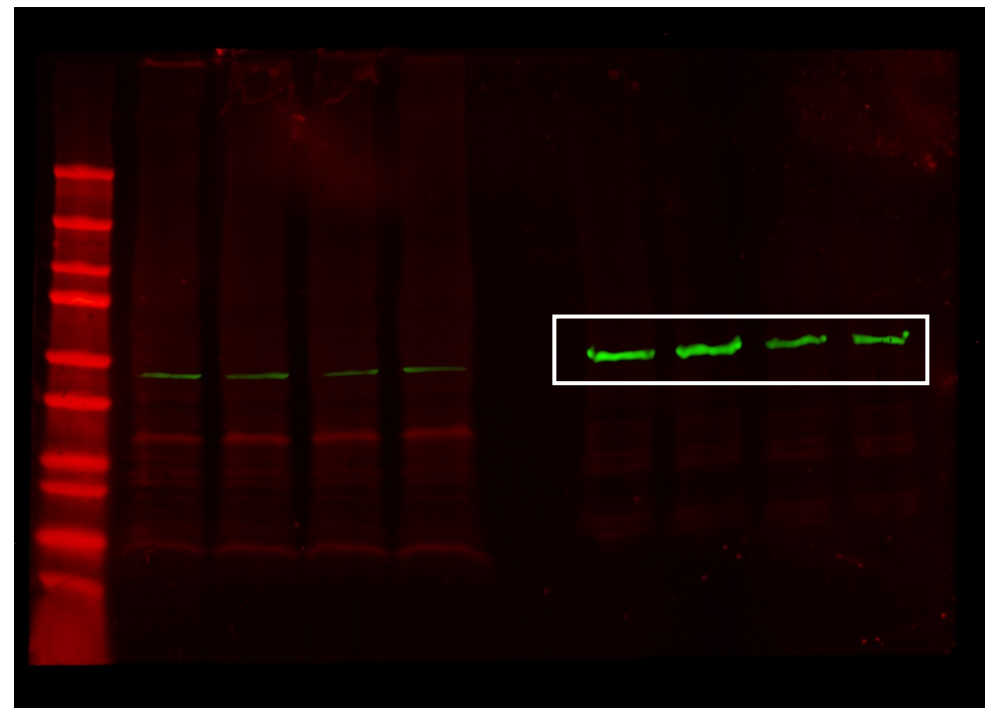



## Figure 7, Panel E

Loading Control

Antibody: Rabbit anti GAPDH (Cell Signaling, 2118)

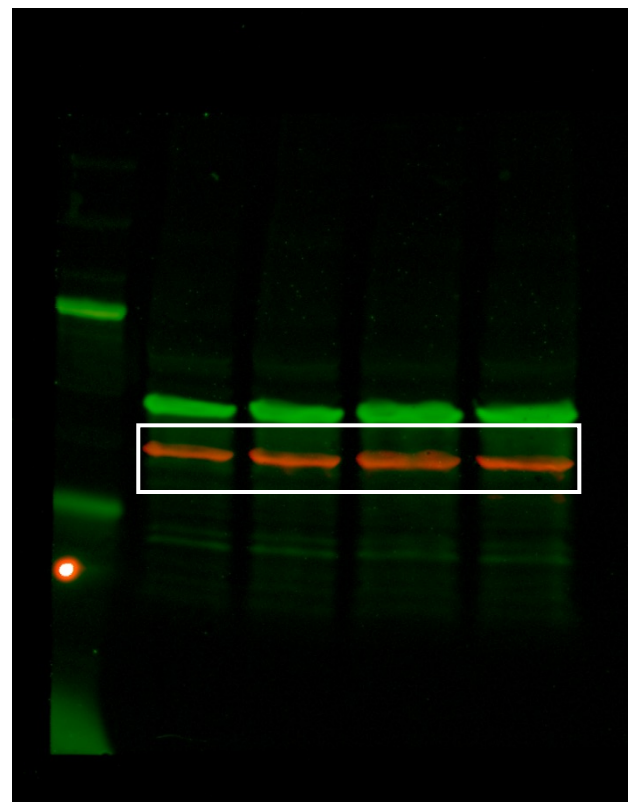

Cropped sections used for figures denoted by white box.

## Figure 7, Panel J (VCP-A232E)

Soluble TDP-4FL  
Antibody: Mouse anti Myc (9E10)

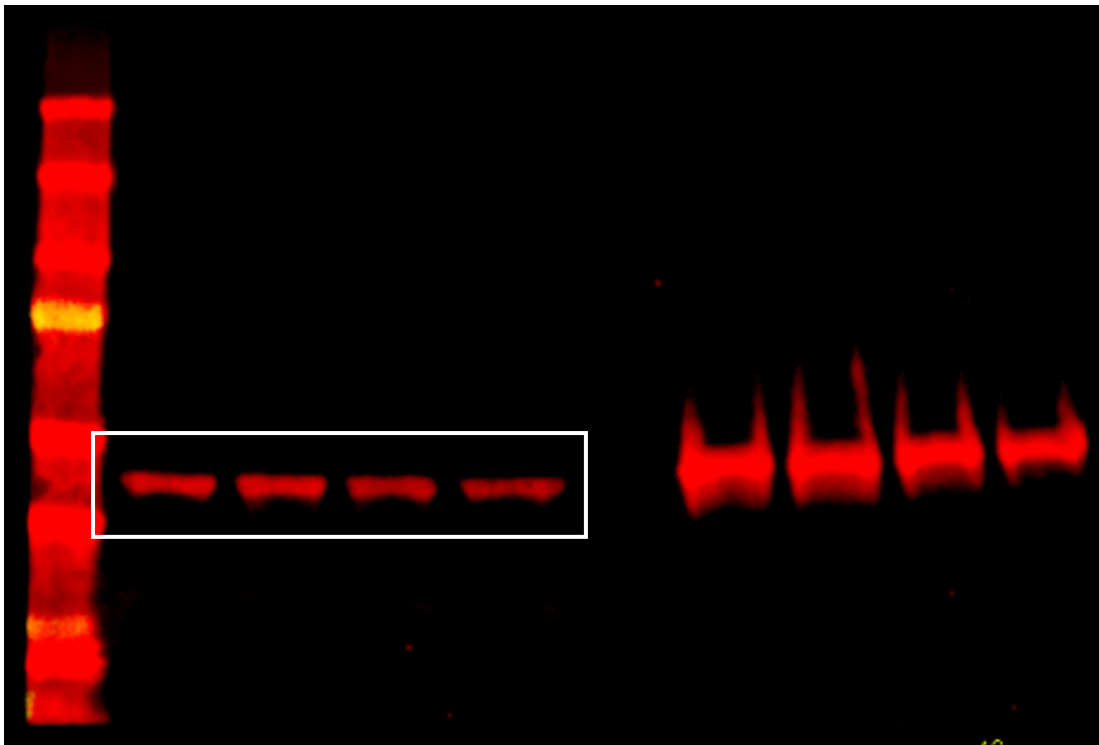

GAPDH Loading Control (Green) & Insoluble TDP-4FL (Red)  
Antibodies: 1) Green: Rabbit anti GAPDH (Cell Signaling, 2118)  
2) Red: Mouse anti Myc (9E10)

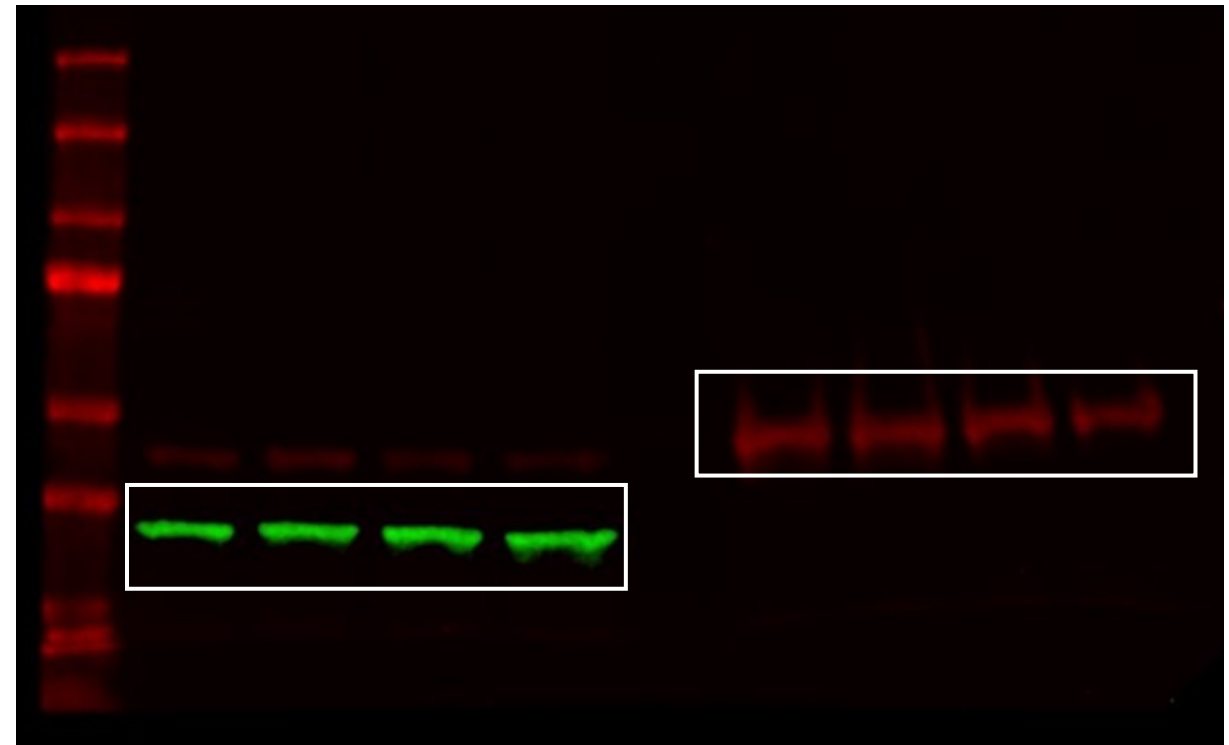

Both blots are the same; Left blot is higher exposure  
Cropped sections used for figures denoted by white box.

## Figure 7, Panel J (VCP-R155H)

Soluble TDP-4FL  
Antibody: Mouse anti Myc (9E10)

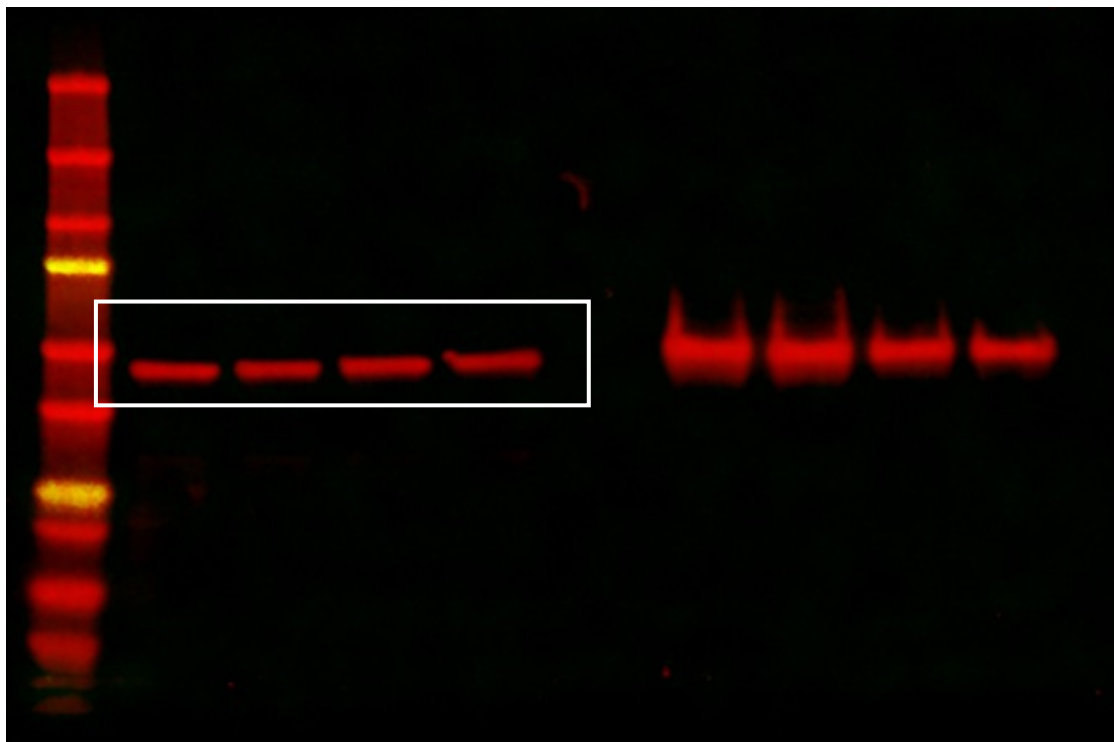

GAPDH Loading Control (Green) & Insoluble TDP-4FL (Red)  
Antibodies: 1) Green: Rabbit anti GAPDH (Cell Signaling, 2118)  
2) Red: Mouse anti Myc (9E10)

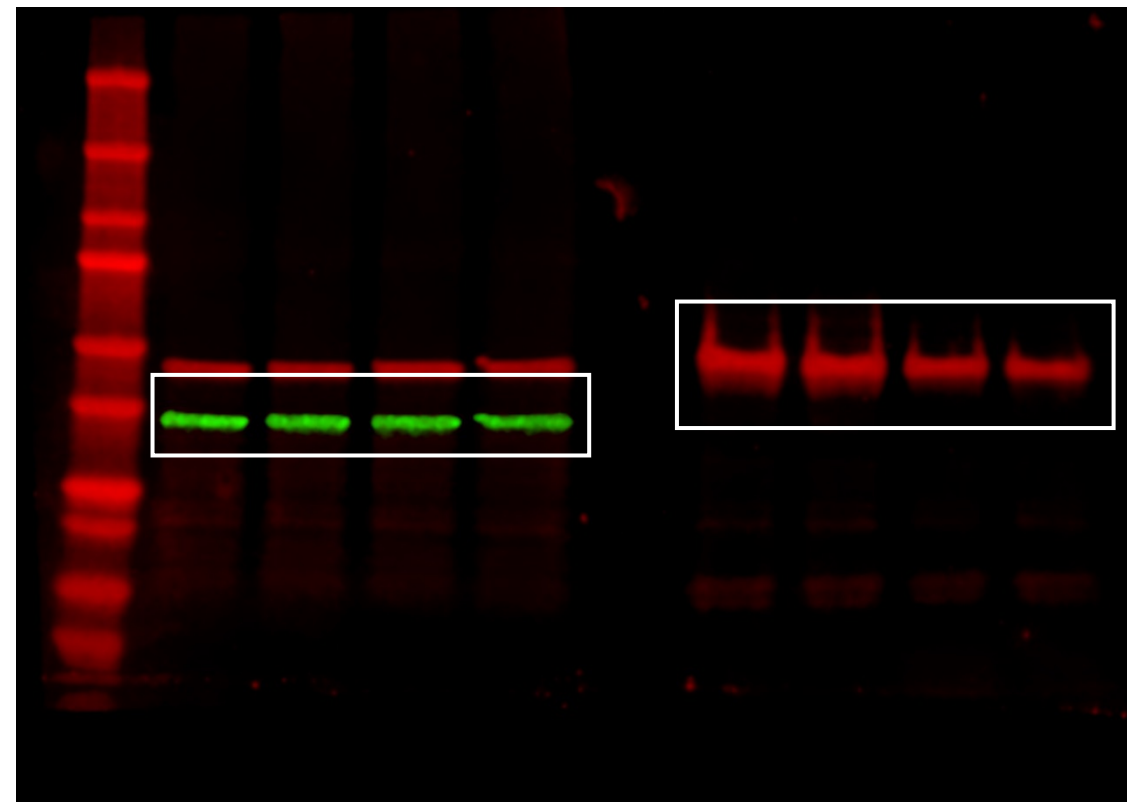

Both blots are the same; Left blot is higher exposure  
Cropped sections used for figures denoted by white box.

Figure 8

## Figure 8, Panel D (Parental cells)

Insoluble TDP-4FL  
Antibody: Mouse anti Myc (9E10)

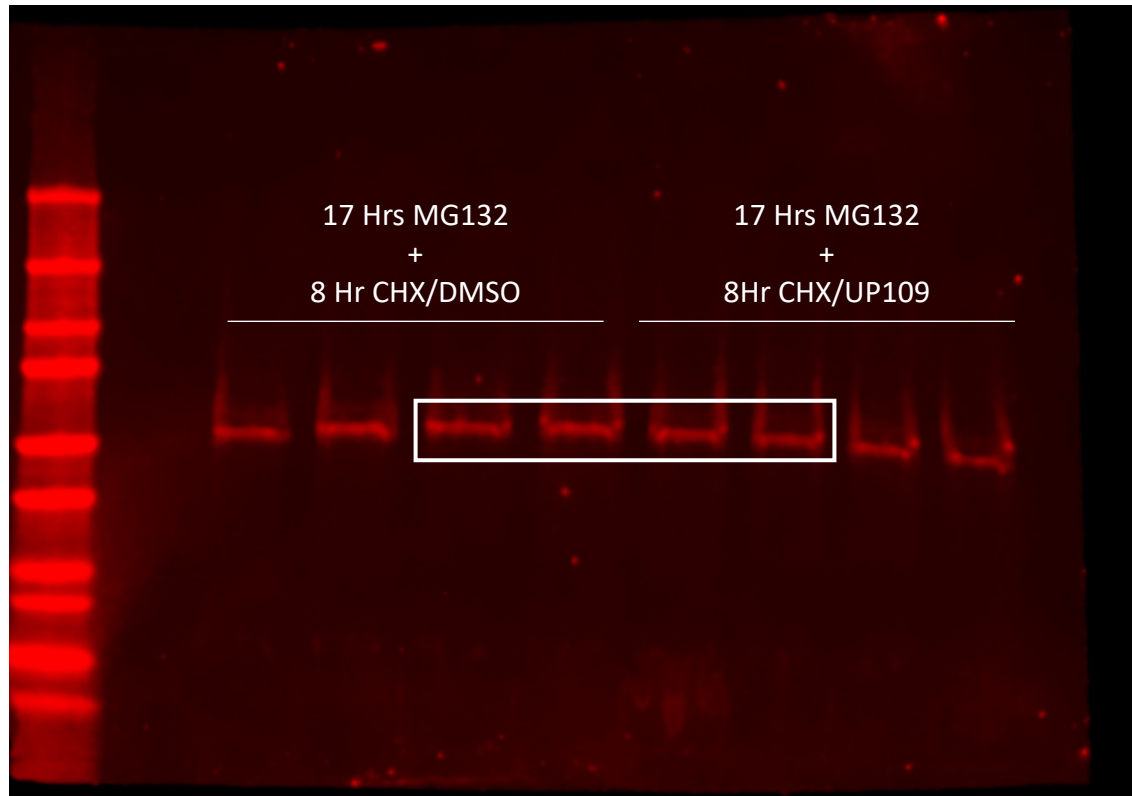

GAPDH Loading Control (Green) & Soluble TDP-4FL (Red)  
Antibodies: 1) Green: Rabbit anti GAPDH (Cell Signaling, 2118)  
2) Red: Mouse anti Myc (9E10)

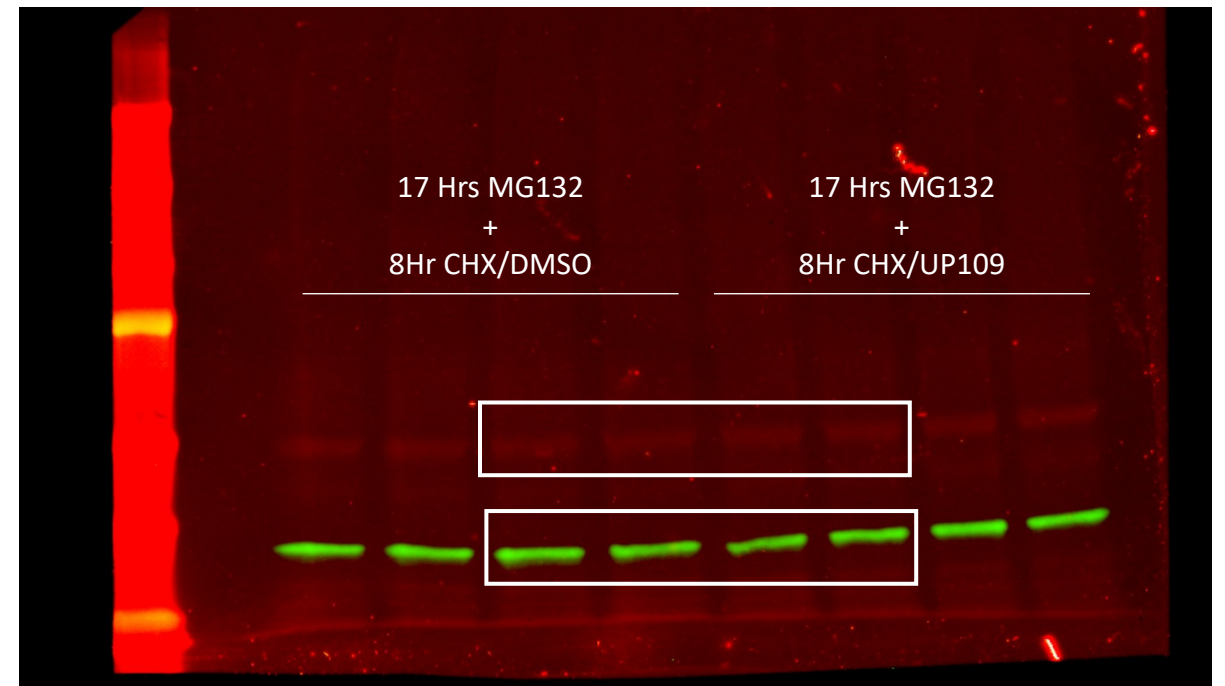

## Figure 8, Panel E (VCP-R159H)

Insoluble TDP-4FL  
Antibody: Mouse anti Myc (9E10)

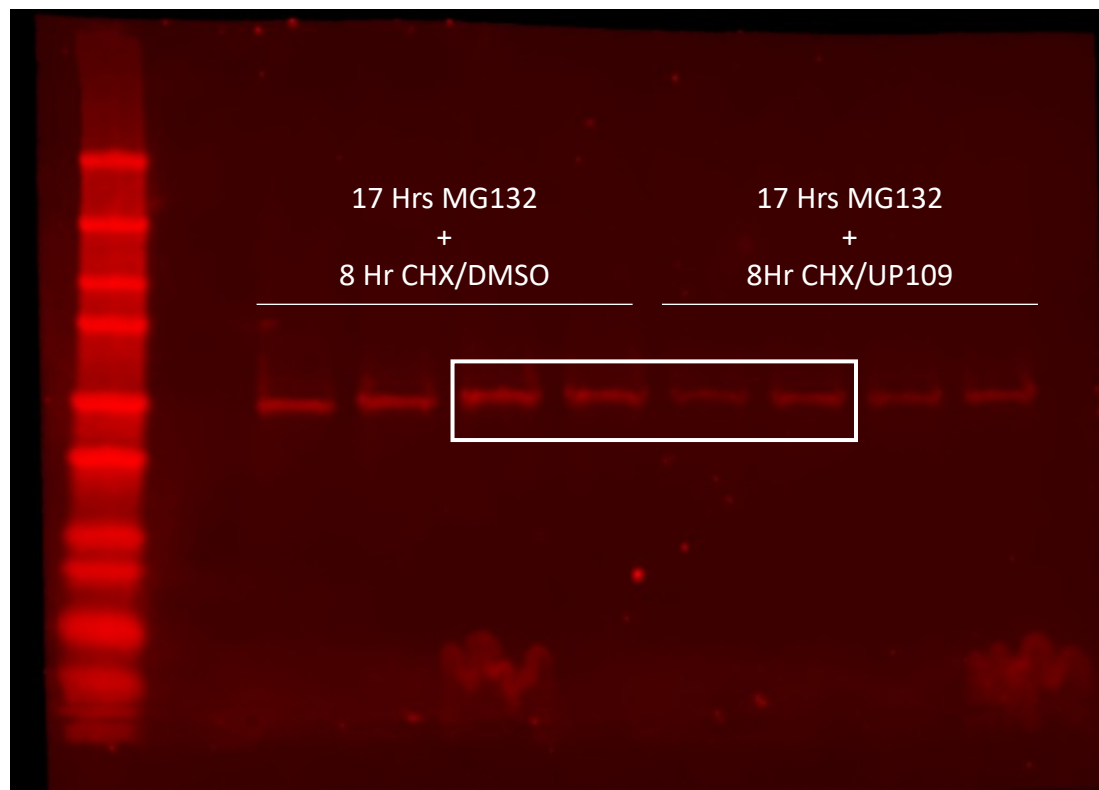

GAPDH Loading Control (Green) & Soluble TDP-4FL (Red)  
Antibodies: 1) Green: Rabbit anti GAPDH (Cell Signaling, 2118)  
2) Red: Mouse anti Myc (9E10)

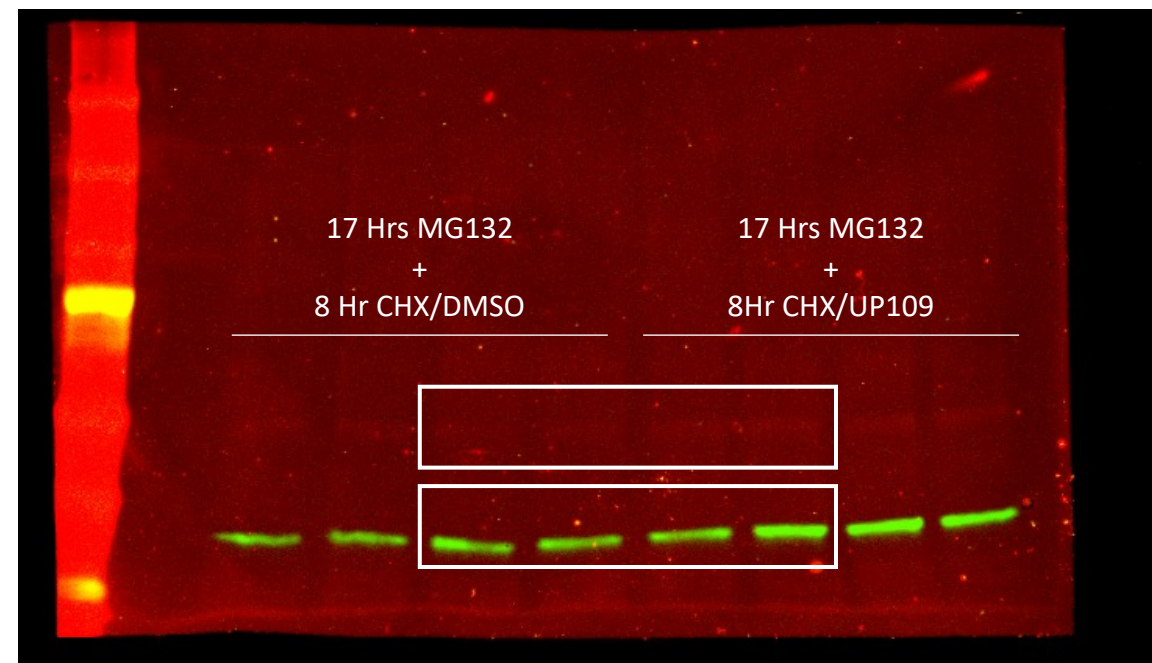

# Supplemental Figure 1

## Supplemental Figure 1, Panel B

Soluble TDP-4FL  
Rabbit anti Ubiquitin (Cell Signaling, 43124)

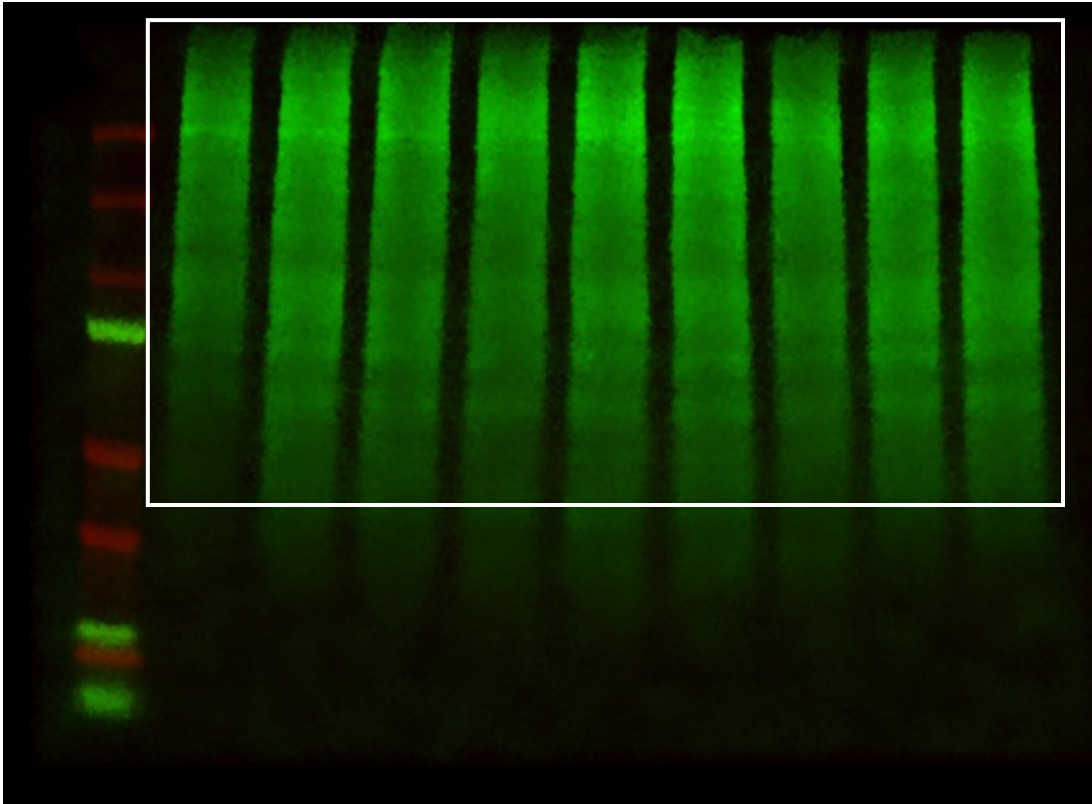

Insoluble TDP-4FL  
Rabbit anti Ubiquitin (Cell Signaling, 43124)

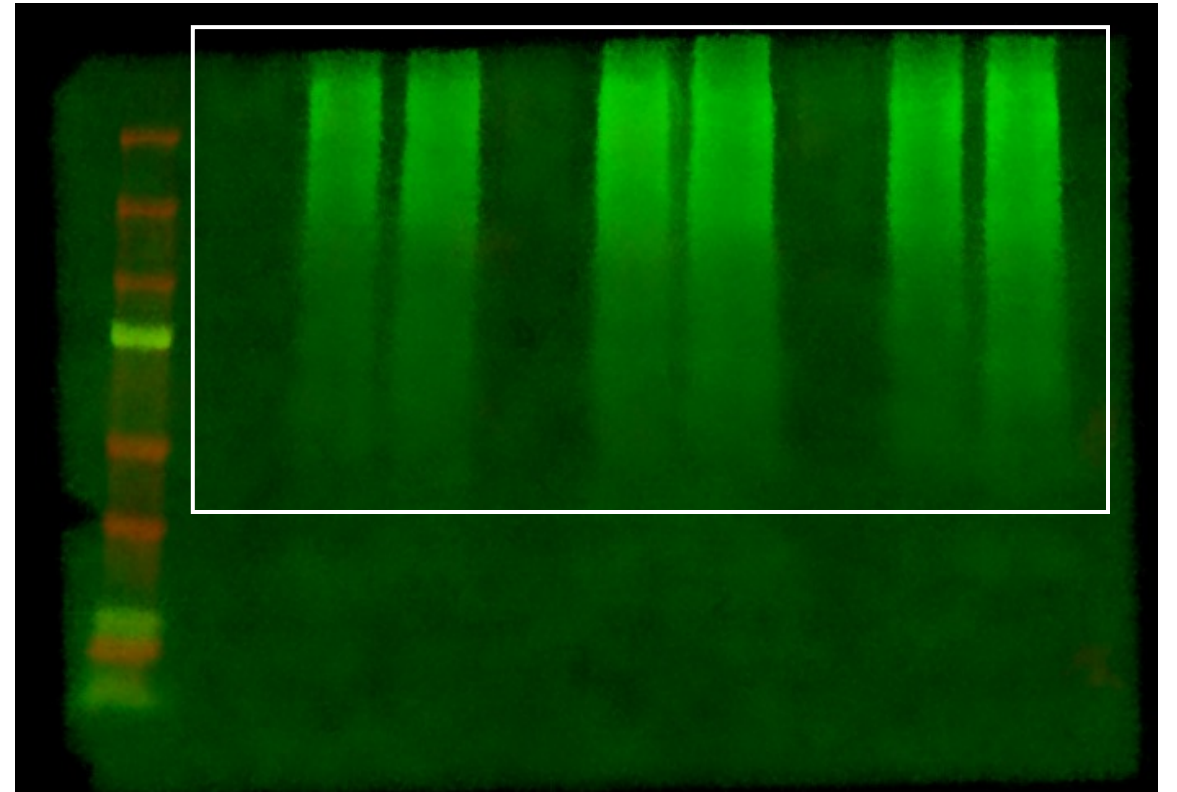



## Supplemental Figure 1, Panel B

Loading Control

Antibody: Rabbit anti GAPDH (Cell Signaling, 2118)

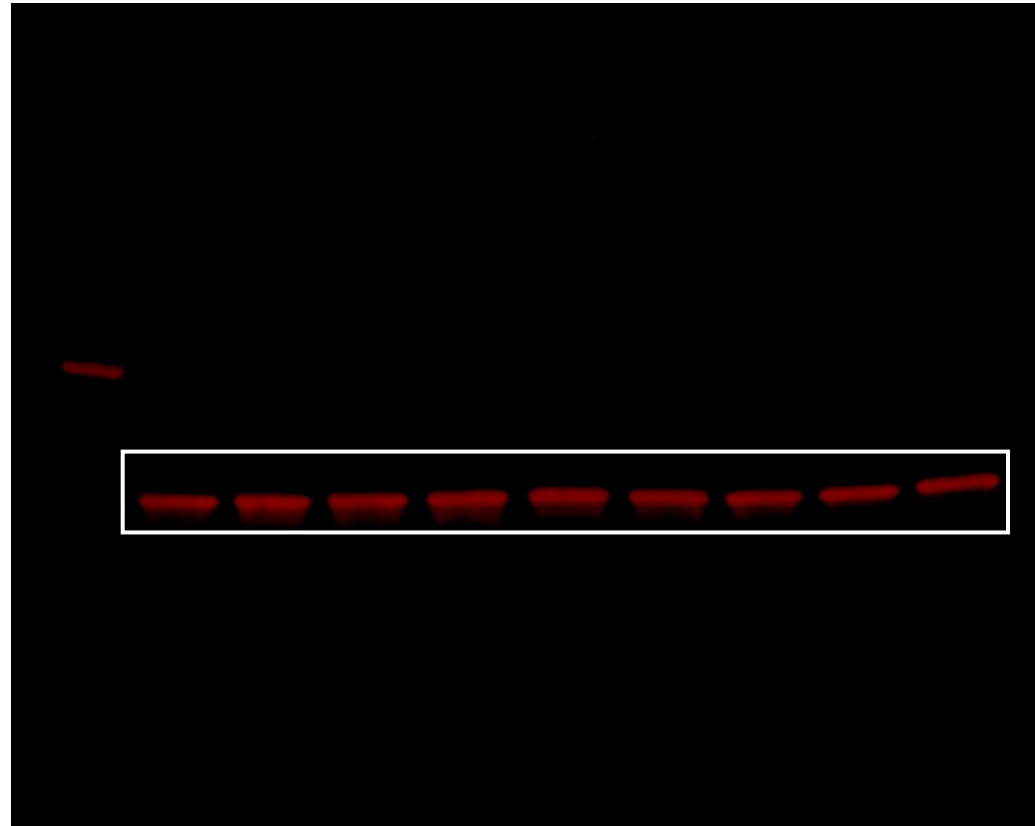

# Supplemental Figure 2

## Supplemental Figure 2, Panel B

Soluble TDP-4FL

Antibody: Mouse anti Myc (9E10)

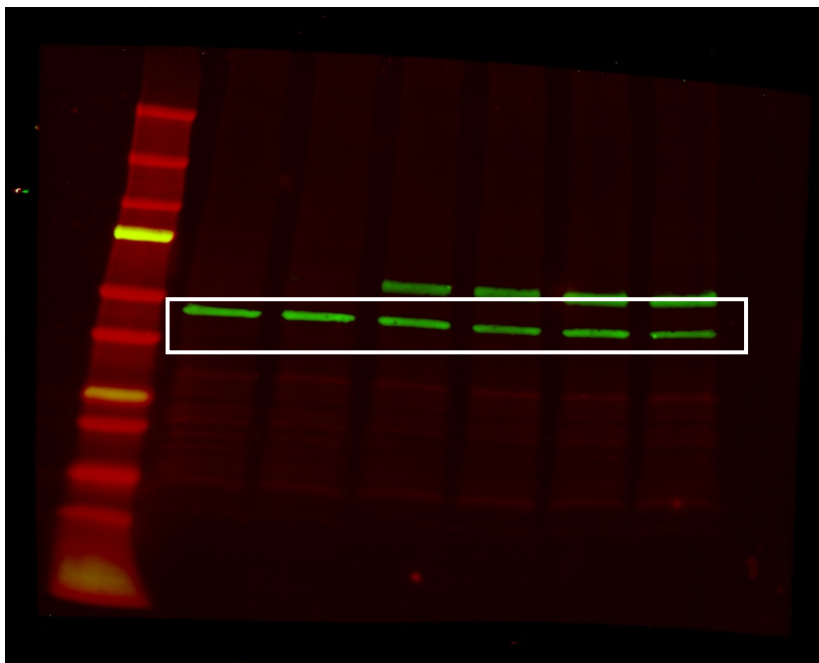

Insoluble TDP-4FL

Antibody: Mouse anti Myc (9E10)

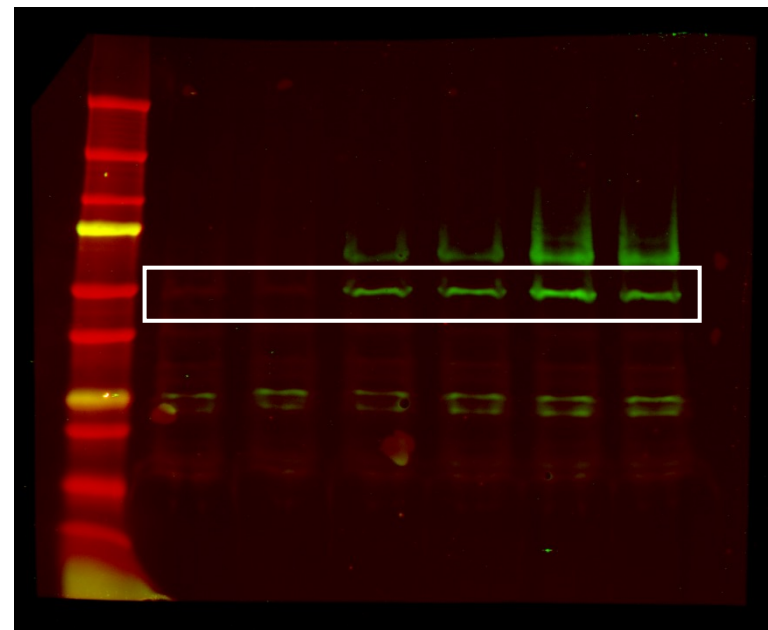

## Supplemental Figure 2, Panel B

Loading Control

Antibody: Rabbit anti GAPDH (Cell Signaling, 2118)

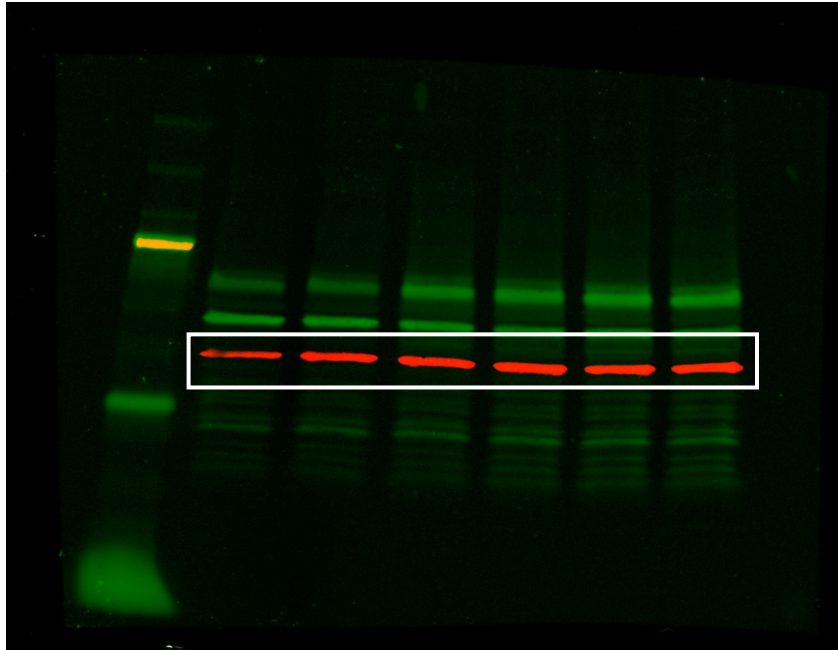

# Supplemental Figure 5

## Supplemental Figure 5, Panel A

Soluble TDP-4FL  
Rabbit anti C-terminal TDP (C2089, Gift from CNDR)

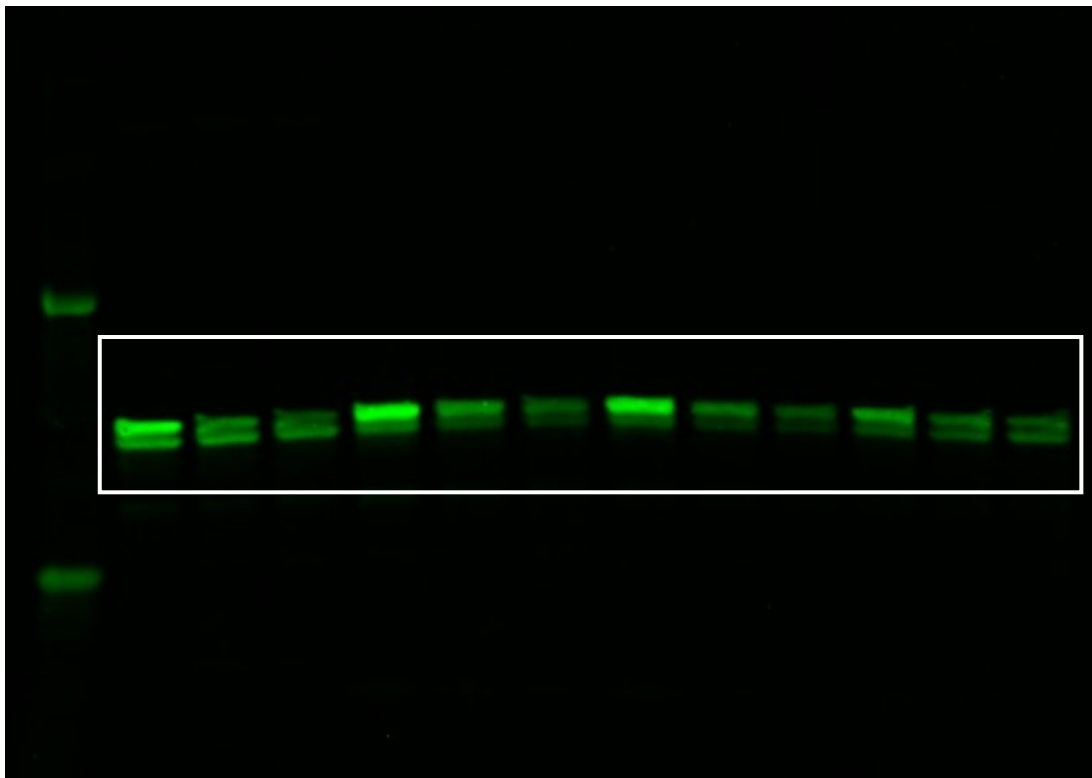

Insoluble TDP-4FL  
Rabbit anti C-terminal TDP (C2089, Gift from CNDR)

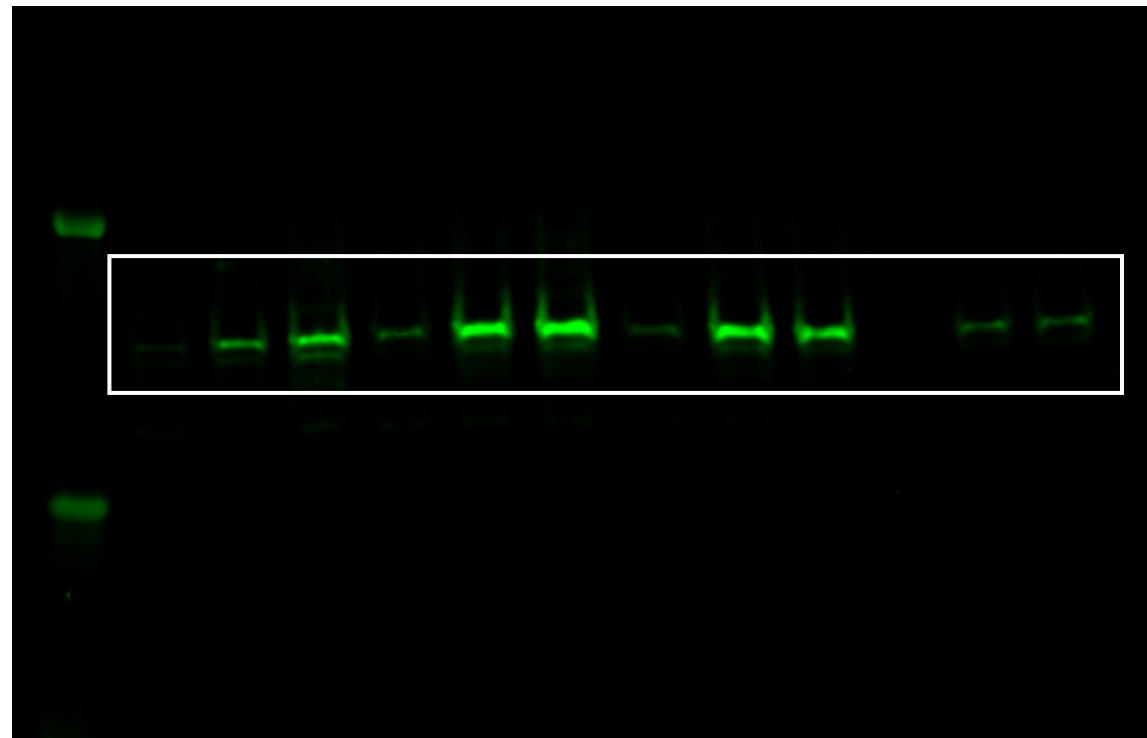

Supplement: sd2 [file 2]
